# Supplementary material for: Fetal programming effects of pentaerythritol tetranitrate in a rat model of superimposed preeclampsia
Source: PubMed Central journal article supplement (PMC7447665; doi:10.1007/s00109-020-01949-0), 2020-08-03
Supplement: 109_2020_1949_MOESM1_ESM.pdf [file 109_2020_1949_MOESM1_ESM.pdf]

Supplementary data

**Fetal programming effects of pentaerythritol tetranitrate in a rat model of superimposed  
preeclampsia**

Andy W C Man<sup>\*,1</sup>, Min Chen<sup>\*,2,1</sup>, Yawen Zhou<sup>1</sup>, Zhixiong Wu<sup>1</sup>, Gisela Reifenberg<sup>1</sup>, Andreas Daiber<sup>3,4</sup>, Thomas Münzel<sup>3,4</sup>, Ning Xia<sup>1</sup>, Huige Li<sup>1</sup>

<sup>1</sup>Department of Pharmacology, Johannes Gutenberg University Medical Center, Mainz, Germany

<sup>2</sup>Department of Anaesthesiology, Institute of Anaesthesiology and Critical Care Medicine, Union Hospital, Tongji Medical College, Huazhong University of Science and Technology, Wuhan, China

<sup>3</sup>Center for Cardiology, Cardiology I - Laboratory of Molecular Cardiology, Johannes Gutenberg University Medical Center, Mainz, Germany

<sup>4</sup>German Center for Cardiovascular Research (DZHK), Partner Site Rhine-Main, Mainz, Germany

**Correspondence:**

Dr. Ning Xia or Prof. Dr. Huige Li, Department of Pharmacology, Johannes Gutenberg University Medical Center, Langenbeck Str. 1, 55131 Mainz, Germany. E-Mail: xianing@uni-mainz.de (N.X.); huigeli@uni-mainz.de (H.L.)

**Supplementary table S1.** Primer list for gene expression studies using qPCR

|         |                          |
|---------|--------------------------|
| COX1-F  | CCTCTGTACCCAAAGACTGTCC   |
| COX1-R  | AAGTGTGTGCAAAGAAAGCAA    |
| COX2-F  | CAGATGCTATCTTTGGGGAGAC   |
| COX2-R  | CACCCTTTCACATTATTGCAGA   |
| Cx37-F  | CAAGCAGGCGAGAGAGGC       |
| Cx37-R  | CGGAAGATGAAGAGCACCGT     |
| Cx40-F  | GGAGGAAAGGAAGCAGAAGGCT   |
| Cx40-R  | AGACCTTGCCGATGACCGTA     |
| eNOS-F  | GGAGGTTACCCGCGTGC        |
| eNOS-R  | GACGCTGGTTGCCATAGTGAC    |
| GAPDH-F | TTCTTGTGCAGTGCCAGCC      |
| GAPDH-R | CGTCCGATACGGCCAAATC      |
| iK1-F   | TGGCTGAGCACCAAGAG C      |
| iK1-R   | TACAGCACCCACTTGCAACC     |
| SK3-F   | CACCTTCCCCAAAGCCAACA     |
| SK3-R   | ACGAAAACATGGAATCCTTTGAGT |
| SOD3    | GGGACCAAGCCTGTGATCTGT    |
| SOD3    | GACCTGGAGATCTGGATGGA     |
| TrpV1-F | TTCACCGAATGGGCCTATGG     |
| TrpV1-R | TGACGGTTAGGGGTCTCACT     |
| TrpV4-F | GCCCATGGATTCGTTGTTCCG    |
| TrpV4-R | TGTGGCTGCTTCTCTACGAC     |

**Supplementary table S2.** Primer list for chromatin accessibility and ChIP-qPCR studies

|         |                       |
|---------|-----------------------|
| COX1-F  | TTGGTAAAAAGGGGGCTCAAC |
| COX1-R  | AGTCAACGGTTTACGAGCAT  |
| Cx37-F  | GTAGAGGGGACGACCGTGG   |
| Cx37-R  | GCAGCTGCGCGCTATTTAAG  |
| SF3-F   | CACCACGGTGACAATGTTGG  |
| SK3-R   | TCACTCCAGATGGGAGCAGT  |
| TrpV1-F | GAGTATGCCCAGAGCCCATC  |
| TrpV1-R | CAGGCTGCTGTGTGGTAAGA  |

## Supplementary data

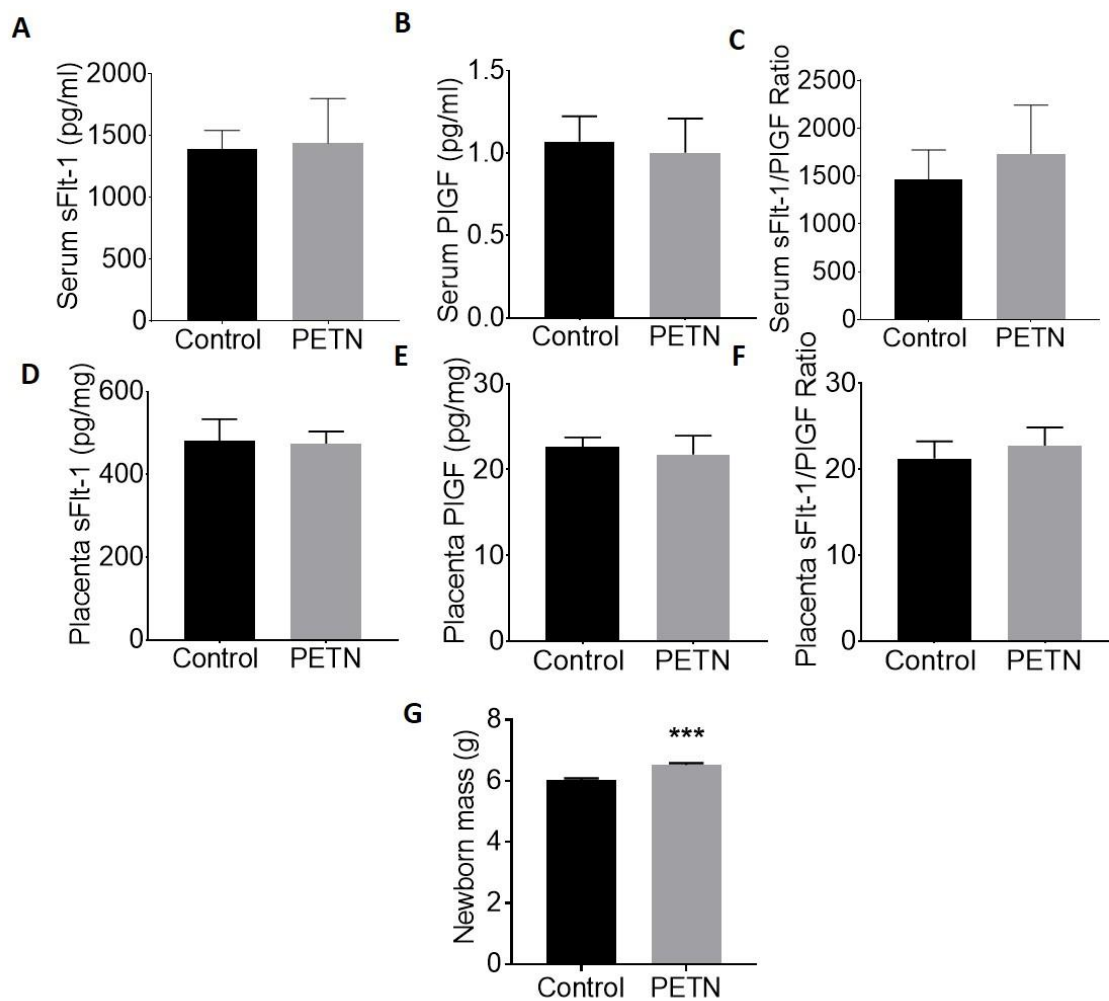

**Fig. S1.** Maternal PETN treatment of DSSR has no effect on preeclampsia markers. F0 DSSR were treated with or without PETN (50 mg/kg/day) during pregnancy and lactation periods. At the end of pregnancy, serum level of sFlt-1 (**A**) and PlGF (**B**) was measured with commercial ELISA assays and the serum sFlt-1/PlGF ratio was calculated (**C**). Placenta collected from pregnant DSSR was homogenized and the amount of sFlt-1 (**D**) and PlGF (**E**) was measured with commercial ELISA assays and the placenta sFlt-1/PlGF ratio was calculated (**F**). The newborn weight was measured at day 1 of the infancy. Symbols represents mean  $\pm$  SEM, n=6. Student's t test and one-way ANOVA were used for comparison of PETN group with control group. \*\*\* $P<0.001$ , vs control group.

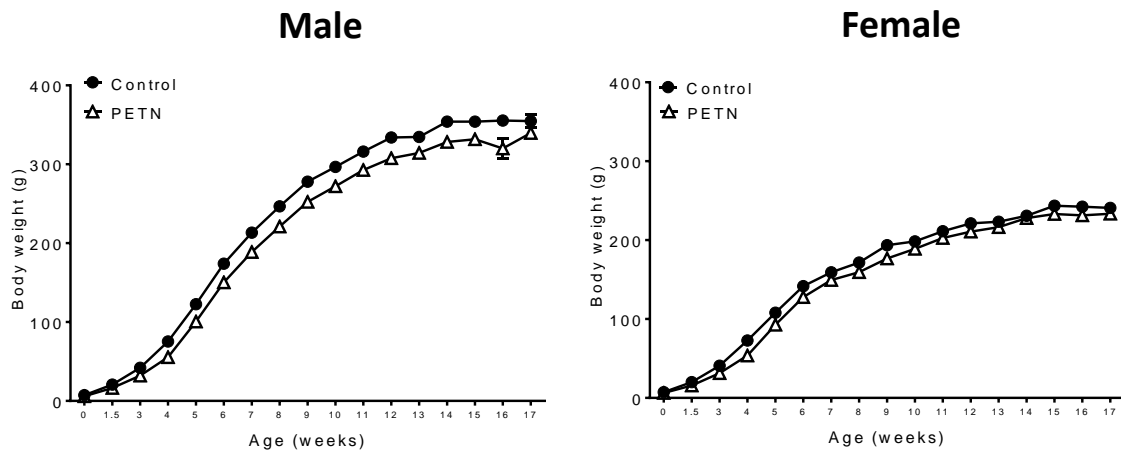

**Fig. S2.** Maternal PETN treatment has no effect on body weight change in the HSD-fed offspring. F0 DSSR were treated with or without PETN (50 mg/kg/day) during pregnancy and lactation periods. F1 DSSR male and female from all groups received LSD starting at the age of 7 weeks followed by HSD (8% NaCl) starting at the age of 8 weeks. Body weight of male and female F1 DSSR was monitored from birth to the age of 17 weeks. n=3-6.

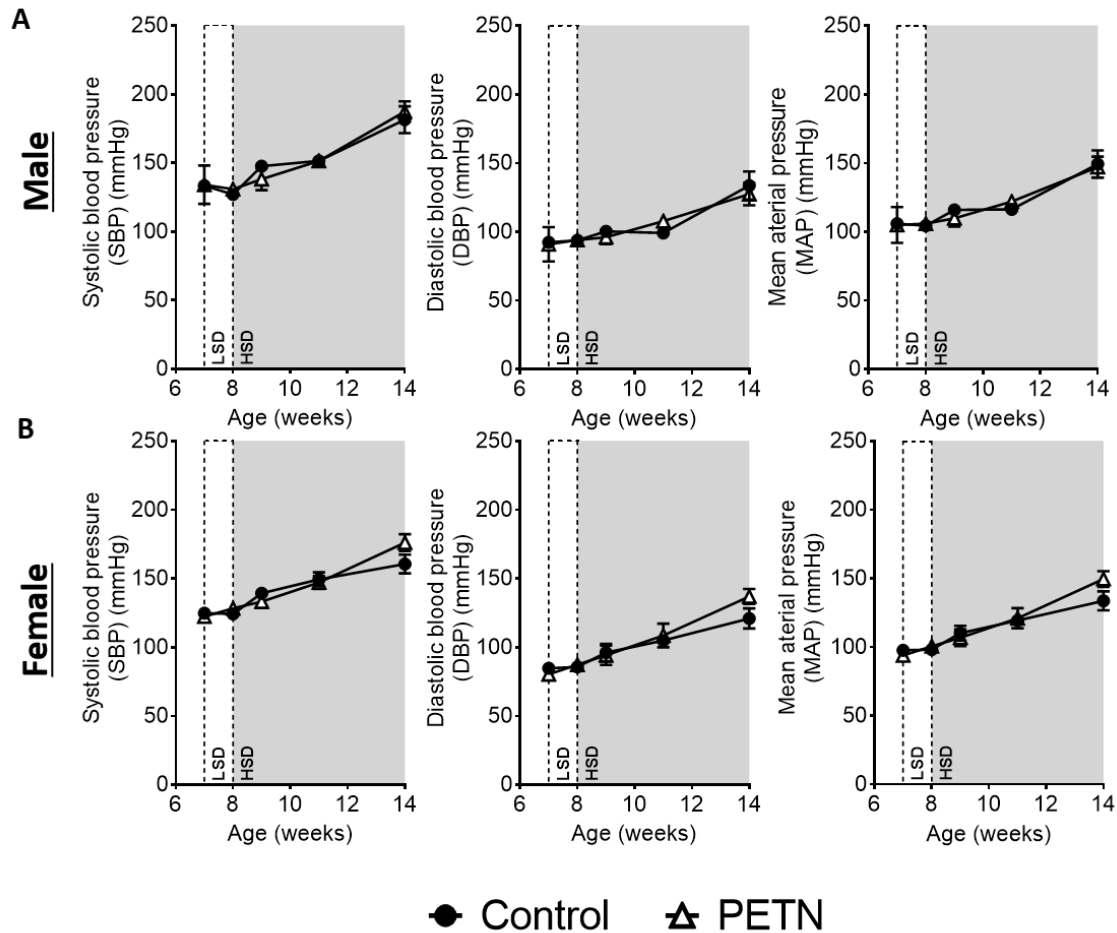

**Fig. S3.** Maternal PETN treatment has no effect on blood pressure development in the HSD-fed F1 DSSR. F0 DSSR were treated with or without PETN (50 mg/kg/day) during pregnancy and lactation periods. F1 DSSR male and female from all groups received LSD (0.369% NaCl) at the age of 7 week and challenged with HSD (8% NaCl) at the age of 8 weeks. Systolic blood pressure (**SBP**), diastolic blood pressure (**DBP**) and mean arterial pressure (**MAP**) were measured in the male (**A**) and female (**B**) offspring. Symbols represent mean  $\pm$  SEM, n=3-6. Student's t test was used for comparison of PETN group with control group at each time point.

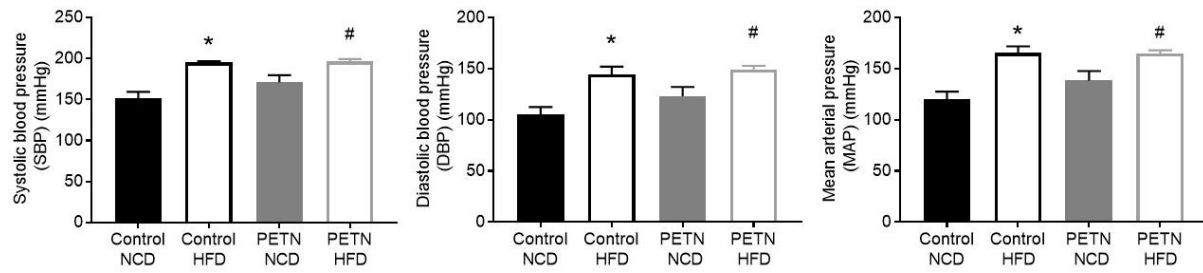

**Fig. S4.** Maternal PETN treatment has no effect on blood pressure development in HFD-fed F1 female DSSR. F0 DSSR were treated with or without PETN (50 mg/kg/day) during pregnancy and lactation periods. F1 DSSR female offspring received either normal chow (NCD) or high-fat diet (HFD) (45% kcal from fat) starting at the age of 5 weeks. Systolic blood pressure (**SBP**), diastolic blood pressure (**DBP**) and mean arterial pressure (**MAP**) were measured in the female offspring at age of 30 weeks. Columns represent mean  $\pm$  SEM, n=3-5. Student's t test was used for comparison. \* $P$ <0.05, vs control-NCD group. # $P$ <0.05, vs PETN-NCD group.

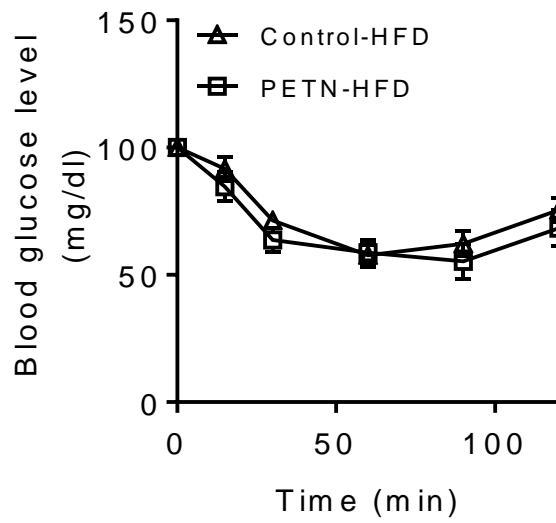

**Fig. S5.** Effects of maternal PETN treatment on glucose metabolism in 16-weeks HFD-fed offspring. Insulin tolerance test (ITT) was performed in HFD-fed 16-weeks old male DSSR offspring with or without maternal PETN treatment. Data were presented as mean  $\pm$  SEM, n=3-6.



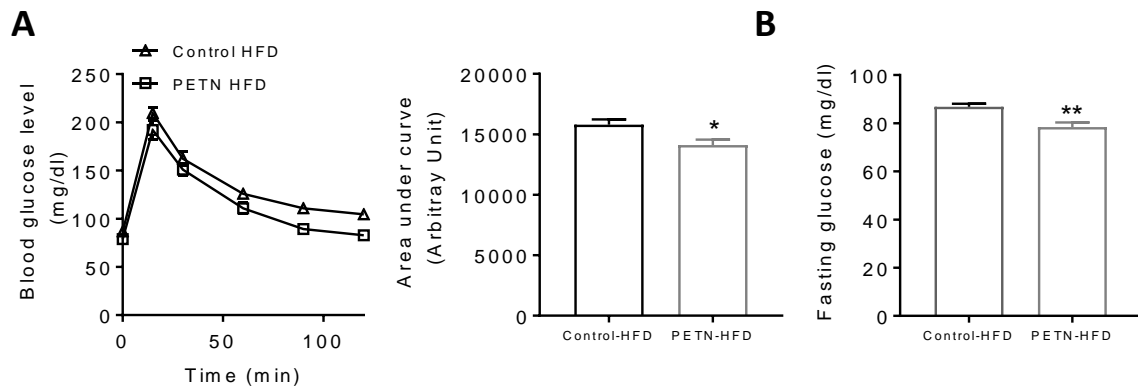

**Fig. S6.** Effects of maternal PETN treatment on glucose metabolism in HFD-fed offspring. F0 DSSR were treated with or without PETN (50 mg/kg/day) during pregnancy and lactation periods. F1 DSSR male offspring received either normal chow (NCD) or high-fat diet (HFD) (45% kcal from fat) starting at the age of 5 weeks. **(A)** Glucose tolerance test (GTT) was performed in HFD-fed 28-week-old male DSSR and the area under curve was calculated for comparison. **(B)** Glucose level of F1 DSSR after overnight fasting was measured. Data were presented as mean  $\pm$  SEM, n=8. Student's t test and one-way ANOVA were used for comparison of respective NCD and HFD group. \* $P$ <0.05, \*\* $P$ <0.01, vs control-HFD group.

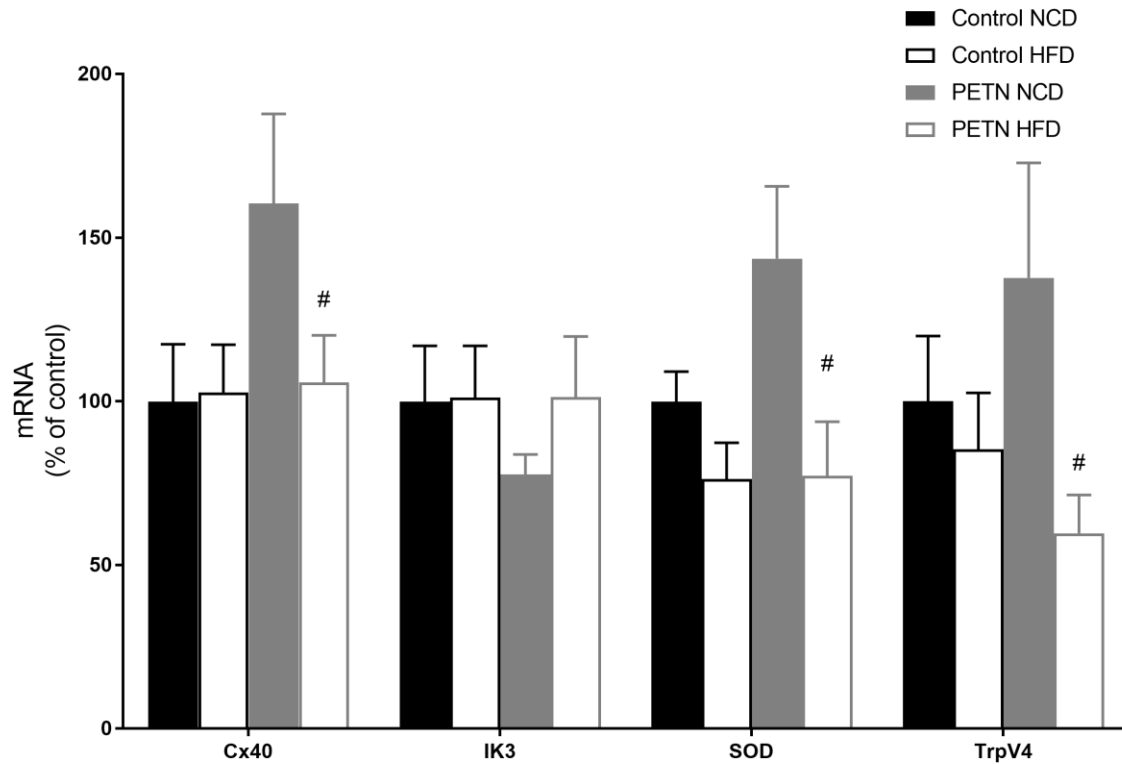

**Fig. S7.** Effects of maternal PETN treatment on gene expression in aorta of HFD-fed F1 DSSR. F0 DSSR were treated with or without PETN (50 mg/kg/day) during pregnancy and lactation periods. F1 DSSR male offspring received either normal chow (NCD) or high-fat diet (HFD) (45% kcal from fat) starting at the age of 5 weeks. Gene expressions of connexin-40 (Cx40), intermediate conductance  $\text{Ca}^{2+}$ -activated  $\text{K}^+$  channels 3 (IK3), superoxide dismutase 3 (SOD) and transient receptor potential cation channel subfamily V member 4 (TrpV4) were analyzed in the aorta of the 16-week-old male F1 DSSR with quantitative real-time PCR. Columns represent mean  $\pm$  SEM.  $n = 6$ . Student's  $t$  test was used for comparison of respective NCD and HFD group. # $P < 0.05$ , vs PETN-NCD group.

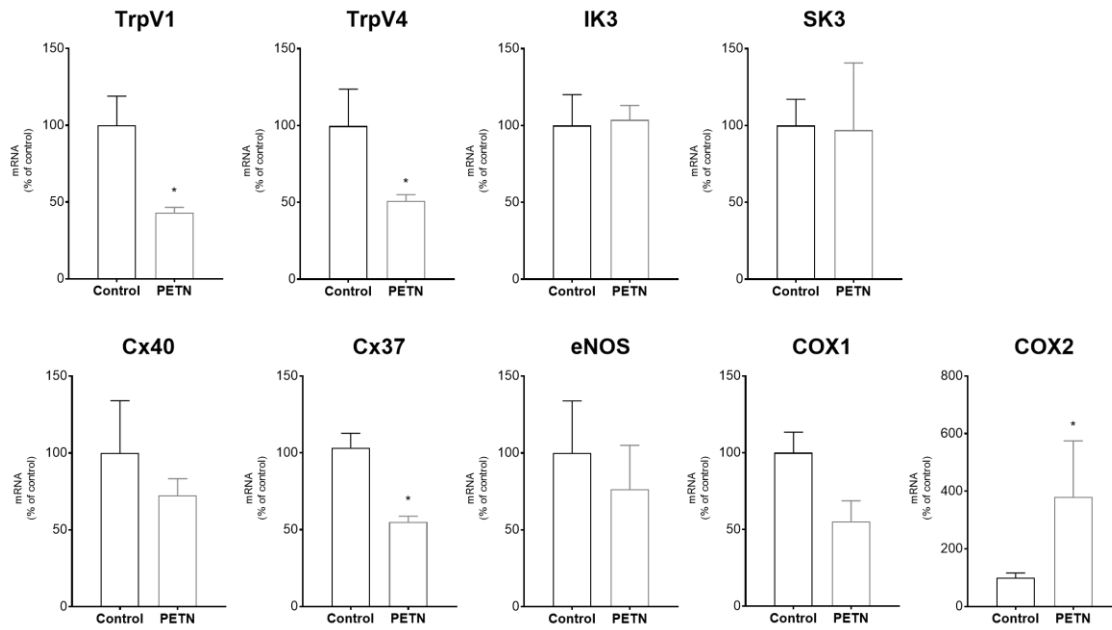

**Fig. S8.** Effects of maternal PETN treatment on gene expression in mesenteric arteries of HFD-fed F1 DSSR. F0 DSSR were treated with or without PETN (50 mg/kg/day) during pregnancy and lactation periods. F1 DSSR male received high-fat diet (HFD) (45% kcal from fat) starting at the age of 5 weeks. Gene expressions of transient receptor potential cation channel subfamily V member 1 (TrpV1) and 4 (TrpV4), intermediate conductance  $\text{Ca}^{2+}$ -activated  $\text{K}^+$  channels 3 (IK3), small conductance calcium-activated potassium channel 3 (SK3), connexin-40 (Cx40) and connexin-37 (Cx37), endothelial nitric oxide synthetase (eNOS), cyclooxygenase 1 (COX1) and 2 (COX2) were measured in the mesenteric arteries of the HFD-fed 16-week-old male F1 DSSR with quantitative real-time PCR. Columns represent mean  $\pm$  SEM.  $n = 3$ . Student's t test was used for comparison of control and PETN group. \* $P < 0.05$ , vs control group.
